# Supplementary material
Source: PubMed Central journal article supplement (PMC10600720)
Supplement: jama-e2321739-s003.pdf [file jama-e2321739-s003.pdf]

## Data Sharing Statement

Albert. Sigh Ventilation in Patients with Trauma. *JAMA*. Published October 25, 2023.  
doi:10.1001/jama.2023.21739

### Data

**Data available:** Yes

**Data types:** Deidentified participant data, Participant data with identifiers, Data (not involving human participants), Data dictionary

**How to access data:** [helge@umn.edu](mailto:helge@umn.edu)

**When available:** With publication

### Supporting Documents

**Document types:** None

### Additional Information

**Who can access the data:** On publication

**Types of analyses:** Secondary analyses, testing additional hypotheses or other research proposals.

**Mechanisms of data availability:** With investigator support, after approval of a proposal with signed data access agreement
